# Supplementary material for: Competency Development in Early Nursing Training: A Cross-Sectional OSCE Study of Self-Assessment Versus Examiner Ratings
Source: Research Square preprint supplement (doi:10.21203/rs.3.rs-7518013/v1), 2025-10-13
Supplement: Supplementary file 1 [file ff722b69fd43e0689824cf0f.pdf]

## Competency Self-Assessment Questionnaire

Dear Candidate,

This survey is NOT part of the OSCE and is conducted on a voluntary basis. The data will be used for scientific purposes and for the evaluation of the OSCE assessment and the associated acquisition of competencies.

I hereby acknowledge that my responses will be used for the scientific evaluation of the OSCE assessment and the associated acquisition of competencies.

We appreciate your participation and honest answers!

Please enter the OSCE identification number you received here:

|  |  |  |  |
|--|--|--|--|
|  |  |  |  |
|--|--|--|--|

**1. How do you rate your overall professional knowledge/analytical competence?**

*Meaning: "I can justify my actions."*

|                       |                       |                       |                       |                       |                       |                       |                       |                       |                       |                       |
|-----------------------|-----------------------|-----------------------|-----------------------|-----------------------|-----------------------|-----------------------|-----------------------|-----------------------|-----------------------|-----------------------|
| 0%                    | 10%                   | 20%                   | 30%                   | 40%                   | 50%                   | 60%                   | 70%                   | 80%                   | 90%                   | 100%                  |
| <input type="radio"/> |

**2. How do you rate your overall methodological/procedural competence?**

*Meaning: "I feel confident in my actions."*

|                       |                       |                       |                       |                       |                       |                       |                       |                       |                       |                       |
|-----------------------|-----------------------|-----------------------|-----------------------|-----------------------|-----------------------|-----------------------|-----------------------|-----------------------|-----------------------|-----------------------|
| 0%                    | 10%                   | 20%                   | 30%                   | 40%                   | 50%                   | 60%                   | 70%                   | 80%                   | 90%                   | 100%                  |
| <input type="radio"/> |

**3. How do you rate your overall social/communication competence?**

*Meaning: "I can respond appropriately to the person in front of me."*

|                       |                       |                       |                       |                       |                       |                       |                       |                       |                       |                       |
|-----------------------|-----------------------|-----------------------|-----------------------|-----------------------|-----------------------|-----------------------|-----------------------|-----------------------|-----------------------|-----------------------|
| 0%                    | 10%                   | 20%                   | 30%                   | 40%                   | 50%                   | 60%                   | 70%                   | 80%                   | 90%                   | 100%                  |
| <input type="radio"/> |

#### 4. How do you rate your individual competency on each station?

How do you rate your competencies regarding the station: \_\_\_\_\_

|                                   |                       |                       |                       |                       |                       |                       |                       |                       |                       |                       |                       |
|-----------------------------------|-----------------------|-----------------------|-----------------------|-----------------------|-----------------------|-----------------------|-----------------------|-----------------------|-----------------------|-----------------------|-----------------------|
| professional knowledge/analytical | 0%                    | 10%                   | 20%                   | 30%                   | 40%                   | 50%                   | 60%                   | 70%                   | 80%                   | 90%                   | 100%                  |
|                                   | <input type="radio"/> |
| methodological/procedural         | 0%                    | 10%                   | 20%                   | 30%                   | 40%                   | 50%                   | 60%                   | 70%                   | 80%                   | 90%                   | 100%                  |
|                                   | <input type="radio"/> |
| social/communication              | 0%                    | 10%                   | 20%                   | 30%                   | 40%                   | 50%                   | 60%                   | 70%                   | 80%                   | 90%                   | 100%                  |
|                                   | <input type="radio"/> |

How do you rate your competencies regarding the station: \_\_\_\_\_

|                                   |                       |                       |                       |                       |                       |                       |                       |                       |                       |                       |                       |
|-----------------------------------|-----------------------|-----------------------|-----------------------|-----------------------|-----------------------|-----------------------|-----------------------|-----------------------|-----------------------|-----------------------|-----------------------|
| professional knowledge/analytical | 0%                    | 10%                   | 20%                   | 30%                   | 40%                   | 50%                   | 60%                   | 70%                   | 80%                   | 90%                   | 100%                  |
|                                   | <input type="radio"/> |
| methodological/procedural         | 0%                    | 10%                   | 20%                   | 30%                   | 40%                   | 50%                   | 60%                   | 70%                   | 80%                   | 90%                   | 100%                  |
|                                   | <input type="radio"/> |
| social/communication              | 0%                    | 10%                   | 20%                   | 30%                   | 40%                   | 50%                   | 60%                   | 70%                   | 80%                   | 90%                   | 100%                  |
|                                   | <input type="radio"/> |

How do you rate your competencies regarding the station: \_\_\_\_\_

|                                   |                       |                       |                       |                       |                       |                       |                       |                       |                       |                       |                       |
|-----------------------------------|-----------------------|-----------------------|-----------------------|-----------------------|-----------------------|-----------------------|-----------------------|-----------------------|-----------------------|-----------------------|-----------------------|
| professional knowledge/analytical | 0%                    | 10%                   | 20%                   | 30%                   | 40%                   | 50%                   | 60%                   | 70%                   | 80%                   | 90%                   | 100%                  |
|                                   | <input type="radio"/> |
| methodological/procedural         | 0%                    | 10%                   | 20%                   | 30%                   | 40%                   | 50%                   | 60%                   | 70%                   | 80%                   | 90%                   | 100%                  |
|                                   | <input type="radio"/> |
| social/communication              | 0%                    | 10%                   | 20%                   | 30%                   | 40%                   | 50%                   | 60%                   | 70%                   | 80%                   | 90%                   | 100%                  |
|                                   | <input type="radio"/> |

**How do you rate your competencies regarding the station:** \_\_\_\_\_

|                                   |                       |                       |                       |                       |                       |                       |                       |                       |                       |                       |                       |
|-----------------------------------|-----------------------|-----------------------|-----------------------|-----------------------|-----------------------|-----------------------|-----------------------|-----------------------|-----------------------|-----------------------|-----------------------|
| professional knowledge/analytical | 0%                    | 10%                   | 20%                   | 30%                   | 40%                   | 50%                   | 60%                   | 70%                   | 80%                   | 90%                   | 100%                  |
|                                   | <input type="radio"/> |
| methodological/procedural         | 0%                    | 10%                   | 20%                   | 30%                   | 40%                   | 50%                   | 60%                   | 70%                   | 80%                   | 90%                   | 100%                  |
|                                   | <input type="radio"/> |
| social/communication              | 0%                    | 10%                   | 20%                   | 30%                   | 40%                   | 50%                   | 60%                   | 70%                   | 80%                   | 90%                   | 100%                  |
|                                   | <input type="radio"/> |

**How do you rate your competencies regarding the station:** \_\_\_\_\_

|                                   |                       |                       |                       |                       |                       |                       |                       |                       |                       |                       |                       |
|-----------------------------------|-----------------------|-----------------------|-----------------------|-----------------------|-----------------------|-----------------------|-----------------------|-----------------------|-----------------------|-----------------------|-----------------------|
| professional knowledge/analytical | 0%                    | 10%                   | 20%                   | 30%                   | 40%                   | 50%                   | 60%                   | 70%                   | 80%                   | 90%                   | 100%                  |
|                                   | <input type="radio"/> |
| methodological/procedural         | 0%                    | 10%                   | 20%                   | 30%                   | 40%                   | 50%                   | 60%                   | 70%                   | 80%                   | 90%                   | 100%                  |
|                                   | <input type="radio"/> |
| social/communication              | 0%                    | 10%                   | 20%                   | 30%                   | 40%                   | 50%                   | 60%                   | 70%                   | 80%                   | 90%                   | 100%                  |
|                                   | <input type="radio"/> |

**How do you rate your competencies regarding the station:** \_\_\_\_\_

|                                   |                       |                       |                       |                       |                       |                       |                       |                       |                       |                       |                       |
|-----------------------------------|-----------------------|-----------------------|-----------------------|-----------------------|-----------------------|-----------------------|-----------------------|-----------------------|-----------------------|-----------------------|-----------------------|
| professional knowledge/analytical | 0%                    | 10%                   | 20%                   | 30%                   | 40%                   | 50%                   | 60%                   | 70%                   | 80%                   | 90%                   | 100%                  |
|                                   | <input type="radio"/> |
| methodological/procedural         | 0%                    | 10%                   | 20%                   | 30%                   | 40%                   | 50%                   | 60%                   | 70%                   | 80%                   | 90%                   | 100%                  |
|                                   | <input type="radio"/> |
| social/communication              | 0%                    | 10%                   | 20%                   | 30%                   | 40%                   | 50%                   | 60%                   | 70%                   | 80%                   | 90%                   | 100%                  |
|                                   | <input type="radio"/> |
